# Supplementary material for: Lysyl Oxidase-like Protein Recognizes Viral Envelope Proteins and Bacterial Polysaccharides against Pathogen Infection via Induction of Expression of Antimicrobial Peptides
Source: MDPI journal article supplement (doi:10.3390/v14092072), 2022-09-18
Supplement: s1 [file s1]

## Supplementary information

**Table S1.** Sequences of the primers used in this research.

| Primers                | Sequence (5'-3')                            |
|------------------------|---------------------------------------------|
| RT-PCR and qRT-PCR     |                                             |
| Actin-RT-F             | AGTAGCCGCCCTGGTTGTAGAC                      |
| Actin-RT-R             | TTCTCCATGTCGTCCCAGT                         |
| Dorsal-RT-F            | GCAATGCTGGTAACCTGGCTA                       |
| Dorsal-RT-R            | CTATGGGATTTTGGTCAATACACTTT                  |
| Ef1- $\alpha$ -RT-F    | GGATTGCCACACCGCTCACA                        |
| Ef1- $\alpha$ -RT-R    | CACAGCCACCGTTTGCTTCAT                       |
| ie1-RT-F               | GACTCTACAAATCTCTTTGCCA                      |
| ie1-RT-R               | CTACCTTTGCACCAATTGCTAG                      |
| LOXL-RT-F              | CTGAGACCTCCCTTTACGA                         |
| LOXL-RT-R              | CAGAGCCACAACTCCATC                          |
| Relish-RT-F            | AGGATGAAGATGAGGAGGAA                        |
| Relish-RT-R            | GAGATGTCAATGCCCGAGT                         |
| STAT-RT-F              | CGCCCAAATGGAATGAT                           |
| STAT-RT-R              | CGGATAAAGGTAAAGGAGGTA                       |
| VP28-RT-F              | AGCTCCAACACCTCCTCTTCA                       |
| VP28-RT-R              | TTACTCGGTCTCAGTGCCAGA                       |
| Alf-A1-F               | CTGGTTCGTTTCTCGGTGGC                        |
| Alf-A1-R               | CCAACCTGGGCACCACATACTG                      |
| Alf-B1-F               | CGGTGGTGGCCCTGGTGGCACTCTTCG                 |
| Alf-B1-R               | GACTGGCTGCGTGTGCTGGCTTCCCCTC                |
| Alf-C1-F               | CGCTTCAAGGGTCGGATGTG                        |
| Alf-C1-R               | CGAGCCTCTTCCTCCGTGATG                       |
| Alf-C2-F               | TCCTGGTGGTGGCAGTGGCT                        |
| Alf-C2-R               | TGCGGGTCTCGGCTTCTCCT                        |
| Alf-E1-F               | TCCTAACCCACGCAGTGCTTTGCTAATG                |
| Alf-E1-R               | GCTTTTCGGATTTGCCTTCGATGTTTG                 |
| CrusI-1-F              | TGCTCAGAACTCCCTCCACC                        |
| CrusI-1-R              | TTGAATCAGCCCATCGTCG                         |
| CrusI-3-F              | CTCCACCACTCTCGCACTAACA                      |
| CrusI-3-R              | TGATGGTCTCAGATTGGGGC                        |
| q16S-891-F             | TGGAGCATGTGGTTTAATTCGA                      |
| q16S-1003R             | TGCGGGACTTAACCCAACA                         |
| Recombinant expression |                                             |
| LOXL-ORF-F             | TACTCAGGATCCGACGAGGAGGGGAAGATCCGG           |
| LOXL-ORF-R             | TACTCAGAATTCAGGCCGGGTGAGAGAACAATT           |
| LOXL-SRCR1-F           | TACTCAGGATCCATCCGGCTCGTCGACGGCCGC           |
| LOXL-SRCR1-R           | TACTCAGAATTCATCACACACGACCCCCGCCGA           |
| LOXL-SRCR2-F           | TACTCAGGATCCGTGAGACTCGTCGGAGGCCGG           |
| LOXL-SRCR2-R           | TACTCAGAATTCATACAGGTGACGCCCCCGAT            |
| LOXL-lysyl oxidase-F   | TACTCAGGATCCTGTATCGATAAAATAGCTGAT           |
| LOXL-lysyl oxidase-R   | TACTCAGAATTCAGGCCGGGTGAGAGAACAATT           |
| RNA interference       |                                             |
| LOXL-Ri-F              | GCGTAATACGACTCACTATAGGGTGACGGTTGGAGCATTCTGG |

|             |                                             |
|-------------|---------------------------------------------|
| LOXL-Ri-R   | GCGTAATACGACTCACTATAGGAAGCATCGGTTTCCTTGTTGA |
| Gfp-Ri-F    | GCGTAATACGACTCACTATAGGTGGTCCCAATTCTCGTGGAAC |
| Gfp-Ri-R    | GCGTAATACGACTCACTATAGGCTTGAAGTTGACCTTGATGCC |
| Dorsal-Ri-F | GCGTAATACGACCACTATAGGCCATAGAGCTAGATA        |
| Dorsal-Ri-R | GCGTAATACGACTCACTATAGGTCAGTACCCAAGTGT       |
| Relish-Ri-F | GCGTAATACGACTCACTATAGGTGCTGTTGAGAAAGTTAGG   |
| Relish-Ri-R | GCGTAATACGACTCACTATAGGATGTCAGGTGTTGGCATAGA  |
| STAT-Ri-F   | GCGTAATACGACTCACTATAGGCATGGCTCTGGCAGATAAG   |
| STAT-Ri-F   | GCGTAATACGACTCACTATAGGGATGATTGAGACTCGCACC   |

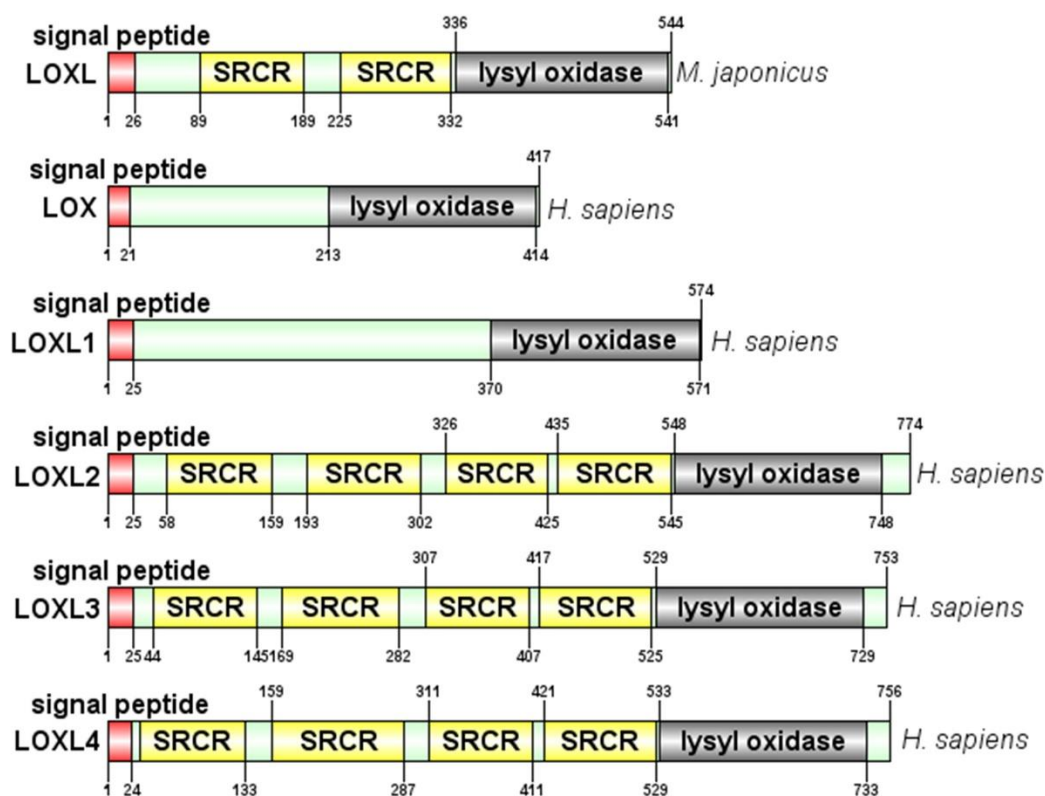

**Figure S1.** Comparison of domain architectures of the LOX/LOXLs in *M. japonicus* and *H. sapiens*. The LOX/LOXL amino acid sequences from *H. sapiens* were obtained from GenBank (LOX, GenBank accession number: AAB23549.1; LOXL1, AAA50162.1; LOXL2, AAH00594.1; LOXL3, AAK63205.1; LOXL4, AAL27543.1).

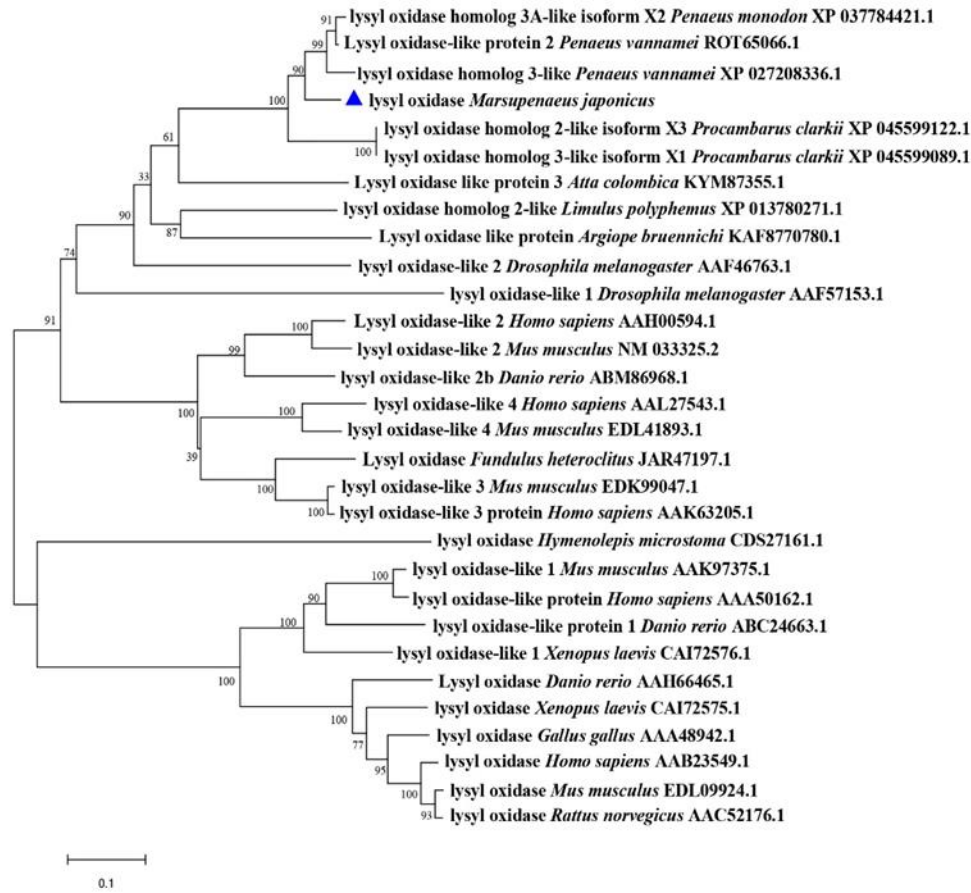

**Figure S2.** Phylogenetic tree of LOX/LOXLs from different species. The LOX/LOXL sequences of different species were obtained from GenBank, and the NJ tree was established using MEGA 7.0. The results were repeated 1000 times via bootstrapping. LOXL of *M. japonicus* is marked with a blue triangle.

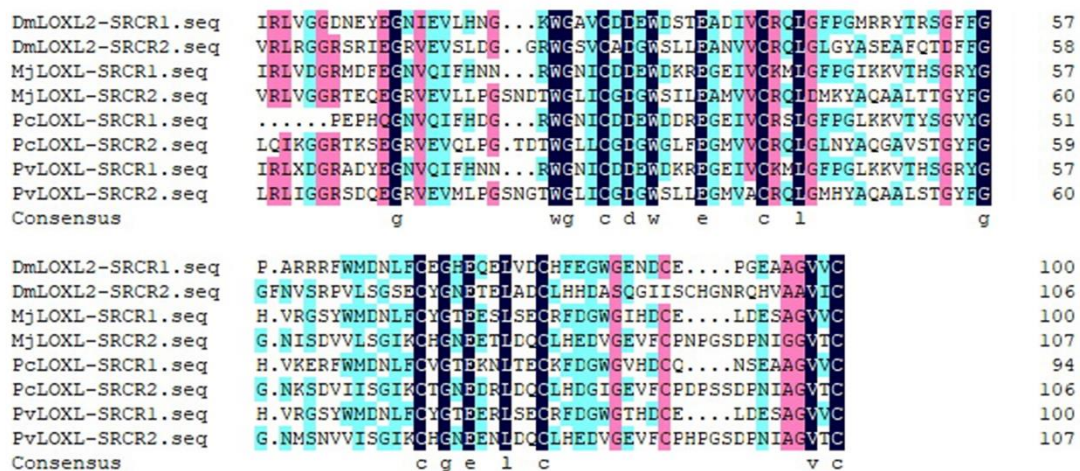

**Figure S3.** Sequence alignment of SRCR1 and SRCR2 domains in different shrimp species. The SRCR1 and SRCR2 sequences of different species were obtained from GenBank, and the alignment was established using DNAMAN.

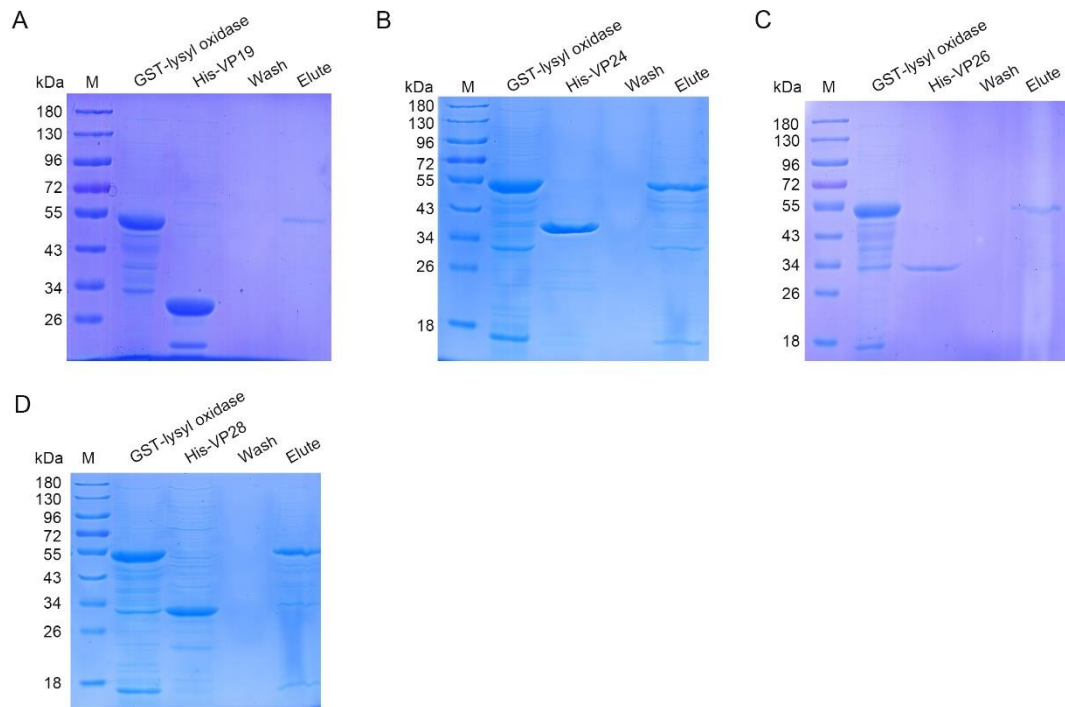

**Figure S5.** Lysyl oxidase domain did not interact with envelope proteins of WSSV. (A, B, C, D) GST-pulldown assays to detect the interaction of lysyl oxidase domain with recombinant VP19, rVP24, rVP26, and rVP28. Lysyl oxidase domain could not bind to envelope proteins

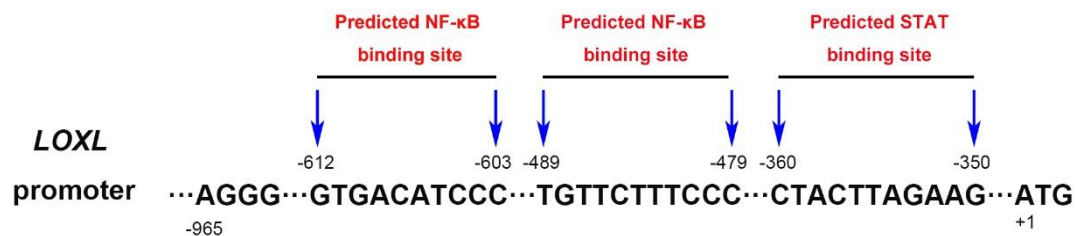

**Figure S5.** Prediction of LOXL promoter region binding to NF-κB or STAT in *M. japonicus*. The promoter sequence of *LoxL* was obtained online from genome of *M. japonicus* (<https://blast.ncbi.nlm.nih.gov/Blast.cgi>). The predicted promoter binding sites were obtained from the online analysis website, JASPAR (<https://jaspar.genereg.net/>).
